# Supplementary material for: Electronic properties of α-graphyne on hexagonal boron nitride and α-BNyne substrates
Source: Royal Society of Chemistry journal article supplement (doi:10.1039/c9ra07869j), 2019-01-01
Supplement: c9ra07869j1.pdf [file c9ra07869j1.pdf]

## Supplementary Information for

# Electronic properties of $\alpha$ -Graphyne on hexagonal boron nitride and $\alpha$ - BNyne substrates

Maoyun Di,<sup>a</sup> Lin Fu,<sup>a</sup> Yong Wang,<sup>a</sup> Kaiyu Zhang,<sup>a</sup> Yongjie Xu,<sup>a</sup> Hongzhe Pan,<sup>\*b</sup>  
Youwei Du<sup>a</sup> and Nujiang Tang<sup>\*a</sup>

<sup>a</sup>*Collaborative Innovation Center of Advanced Microstructures & Jiangsu Provincial Key  
Laboratory for Nanotechnology, Nanjing University, Nanjing 210093, China*

<sup>b</sup>*School of Physics and Electronic Engineering, Linyi University, Linyi 276005, China*

*Corresponding Authors: (N. Tang) E-mail: tangnujiang@nju.edu.cn (H. Pan) E-mail:  
panhongzhe@lyu.edu.cn*

**Table S1.** Structural properties of six emblematic configurations for  $\alpha$ -GY/*h*-BN.

| structure | lattice constant (Å) |        | interlayer distance (Å) | binding energy (meV/atom) |
|-----------|----------------------|--------|-------------------------|---------------------------|
|           | a                    | b      |                         |                           |
| 1         | 20.910               | 12.072 | 1.694                   | -121.636                  |
| 2         | 21.067               | 12.163 | 1.996                   | -104.888                  |
| 3         | 21.224               | 12.253 | 2.833                   | -89.363                   |
| 4         | 21.380               | 12.344 | 3.335                   | -85.913                   |
| 5         | 21.537               | 12.434 | 3.377                   | -84.520                   |
| 6         | 21.694               | 12.525 | 3.392                   | -84.272                   |

**Table S2.** Structural properties of six emblematic configurations for  $\alpha$ -GY/ $\alpha$ -BNy.

| structure | lattice constant (Å)<br>a = b | interlayer distance (Å) | binding energy (meV/atom) |
|-----------|-------------------------------|-------------------------|---------------------------|
| 1         | 6.970                         | 3.354                   | -66.372                   |
| 2         | 6.998                         | 3.413                   | -65.121                   |
| 3         | 7.026                         | 3.485                   | -64.506                   |
| 4         | 7.054                         | 3.572                   | -64.082                   |
| 5         | 7.082                         | 3.569                   | -63.622                   |
| 6         | 7.110                         | 3.592                   | -63.187                   |

**Table S3.** Bader charge and Net charge analysis of  $\alpha$ -GY/*h*-BN. Here the positive denotes charge depletion, while the negative denotes excess charge accumulation.

| Atom number | Atom species | Bader charge (e) | Net charge (e) |
|-------------|--------------|------------------|----------------|
| 1           | C            | 3.6326           | 0.3674         |
| 2           | C            | 3.6038           | 0.3962         |
| 3           | C            | 3.7317           | 0.2683         |

|    |   |        |         |
|----|---|--------|---------|
| 4  | C | 3.6309 | 0.3691  |
| 5  | C | 3.7032 | 0.2968  |
| 6  | C | 3.7397 | 0.2603  |
| 7  | C | 3.7201 | 0.2799  |
| 8  | C | 3.6967 | 0.3033  |
| 9  | C | 3.7155 | 0.2845  |
| 10 | C | 3.6932 | 0.3068  |
| 11 | C | 3.7216 | 0.2784  |
| 12 | C | 3.6265 | 0.3735  |
| 13 | C | 4.1768 | -0.1768 |
| 14 | C | 3.8078 | 0.1922  |
| 15 | C | 3.9755 | 0.0245  |
| 16 | C | 3.9809 | 0.0191  |
| 17 | C | 4.1618 | -0.1618 |
| 18 | C | 4.1872 | -0.1872 |
| 19 | C | 4.3862 | -0.3862 |
| 20 | C | 3.6505 | 0.3495  |
| 21 | C | 4.4659 | -0.4659 |
| 22 | C | 3.9869 | 0.0131  |
| 23 | C | 3.9654 | 0.0346  |
| 24 | C | 3.8571 | 0.1429  |
| 25 | C | 4.1163 | -0.1163 |
| 26 | C | 4.0348 | -0.0348 |
| 27 | C | 3.9124 | 0.0876  |
| 28 | C | 3.9895 | 0.0105  |

|    |   |        |         |
|----|---|--------|---------|
| 29 | C | 3.9599 | 0.0401  |
| 30 | C | 4.3867 | -0.3867 |
| 31 | C | 3.8061 | 0.1939  |
| 32 | C | 4.5498 | -0.5498 |
| 33 | C | 3.7738 | 0.2262  |
| 34 | C | 4.2814 | -0.2814 |
| 35 | C | 4.2218 | -0.2218 |
| 36 | C | 4.3111 | -0.3111 |
| 37 | C | 4.0202 | -0.0202 |
| 38 | C | 4.4009 | -0.4009 |
| 39 | C | 4.2144 | -0.2144 |
| 40 | C | 4.2384 | -0.2384 |
| 41 | C | 4.024  | -0.024  |
| 42 | C | 4.1277 | -0.1277 |
| 43 | C | 4.1078 | -0.1078 |
| 44 | C | 4.2138 | -0.2138 |
| 45 | C | 4.2508 | -0.2508 |
| 46 | C | 4.2063 | -0.2063 |
| 47 | C | 4.2505 | -0.2505 |
| 48 | C | 3.7958 | 0.2042  |
| 49 | N | 7.1746 | -2.1746 |
| 50 | N | 7.1918 | -2.1918 |
| 51 | N | 7.2035 | -2.2035 |
| 52 | N | 7.1945 | -2.1945 |
| 53 | N | 7.1945 | -2.1945 |

|    |   |        |         |
|----|---|--------|---------|
| 54 | N | 7.1977 | -2.1977 |
| 55 | N | 7.2014 | -2.2014 |
| 56 | N | 7.2    | -2.2    |
| 57 | N | 7.2049 | -2.2049 |
| 58 | N | 7.1998 | -2.1998 |
| 59 | N | 7.2033 | -2.2033 |
| 60 | N | 7.1897 | -2.1897 |
| 61 | N | 7.1847 | -2.1847 |
| 62 | N | 7.1859 | -2.1859 |
| 63 | N | 7.2035 | -2.2035 |
| 64 | N | 7.2009 | -2.2009 |
| 65 | N | 7.2074 | -2.2074 |
| 66 | N | 7.1933 | -2.1933 |
| 67 | N | 7.1846 | -2.1846 |
| 68 | N | 7.1983 | -2.1983 |
| 69 | N | 7.196  | -2.196  |
| 70 | N | 7.1937 | -2.1937 |
| 71 | N | 7.2027 | -2.2027 |
| 72 | N | 7.2048 | -2.2048 |
| 73 | N | 7.2007 | -2.2007 |
| 74 | N | 7.1859 | -2.1859 |
| 75 | N | 7.2032 | -2.2032 |
| 76 | N | 7.2154 | -2.2154 |
| 77 | N | 7.2025 | -2.2025 |
| 78 | N | 7.1806 | -2.1806 |

|     |   |        |         |
|-----|---|--------|---------|
| 79  | N | 7.198  | -2.198  |
| 80  | N | 7.1856 | -2.1856 |
| 81  | N | 7.1835 | -2.1835 |
| 82  | N | 7.2022 | -2.2022 |
| 83  | N | 7.209  | -2.209  |
| 84  | N | 7.1984 | -2.1984 |
| 85  | N | 7.1899 | -2.1899 |
| 86  | N | 7.1809 | -2.1809 |
| 87  | N | 7.1884 | -2.1884 |
| 88  | N | 7.1919 | -2.1919 |
| 89  | N | 7.2084 | -2.2084 |
| 90  | N | 7.2023 | -2.2023 |
| 91  | N | 7.2013 | -2.2013 |
| 92  | N | 7.1998 | -2.1998 |
| 93  | N | 7.2062 | -2.2062 |
| 94  | N | 7.1827 | -2.1827 |
| 95  | N | 7.1879 | -2.1879 |
| 96  | N | 7.2064 | -2.2064 |
| 97  | N | 7.1984 | -2.1984 |
| 98  | N | 7.1829 | -2.1829 |
| 99  | B | 0.8165 | 2.1835  |
| 100 | B | 0.8096 | 2.1904  |
| 101 | B | 0.7949 | 2.2051  |
| 102 | B | 0.7974 | 2.2026  |
| 103 | B | 0.8179 | 2.1821  |

|     |   |        |        |
|-----|---|--------|--------|
| 104 | B | 0.8136 | 2.1864 |
| 105 | B | 0.8019 | 2.1981 |
| 106 | B | 0.7893 | 2.2107 |
| 107 | B | 0.8008 | 2.1992 |
| 108 | B | 0.8182 | 2.1818 |
| 109 | B | 0.797  | 2.203  |
| 110 | B | 0.8072 | 2.1928 |
| 111 | B | 0.8135 | 2.1865 |
| 112 | B | 0.7933 | 2.2067 |
| 113 | B | 0.7885 | 2.2115 |
| 114 | B | 0.7971 | 2.2029 |
| 115 | B | 0.8034 | 2.1966 |
| 116 | B | 0.82   | 2.18   |
| 117 | B | 0.8139 | 2.1861 |
| 118 | B | 0.8082 | 2.1918 |
| 119 | B | 0.7928 | 2.2072 |
| 120 | B | 0.7997 | 2.2003 |
| 121 | B | 0.8025 | 2.1975 |
| 122 | B | 0.7943 | 2.2057 |
| 123 | B | 0.7996 | 2.2004 |
| 124 | B | 0.8235 | 2.1765 |
| 125 | B | 0.8035 | 2.1965 |
| 126 | B | 0.7993 | 2.2007 |
| 127 | B | 0.8064 | 2.1936 |
| 128 | B | 0.8052 | 2.1948 |

|     |   |        |        |
|-----|---|--------|--------|
| 129 | B | 0.8008 | 2.1992 |
| 130 | B | 0.7961 | 2.2039 |
| 131 | B | 0.8019 | 2.1981 |
| 132 | B | 0.7964 | 2.2036 |
| 133 | B | 0.8009 | 2.1991 |
| 134 | B | 0.804  | 2.196  |
| 135 | B | 0.8117 | 2.1883 |
| 136 | B | 0.8131 | 2.1869 |
| 137 | B | 0.8152 | 2.1848 |
| 138 | B | 0.7959 | 2.2041 |
| 139 | B | 0.8011 | 2.1989 |
| 140 | B | 0.7982 | 2.2018 |
| 141 | B | 0.8027 | 2.1973 |
| 142 | B | 0.8137 | 2.1863 |
| 143 | B | 0.8025 | 2.1975 |
| 144 | B | 0.8042 | 2.1958 |
| 145 | B | 0.8078 | 2.1922 |
| 146 | B | 0.792  | 2.208  |
| 147 | B | 0.7953 | 2.2047 |
| 148 | B | 0.8018 | 2.1982 |



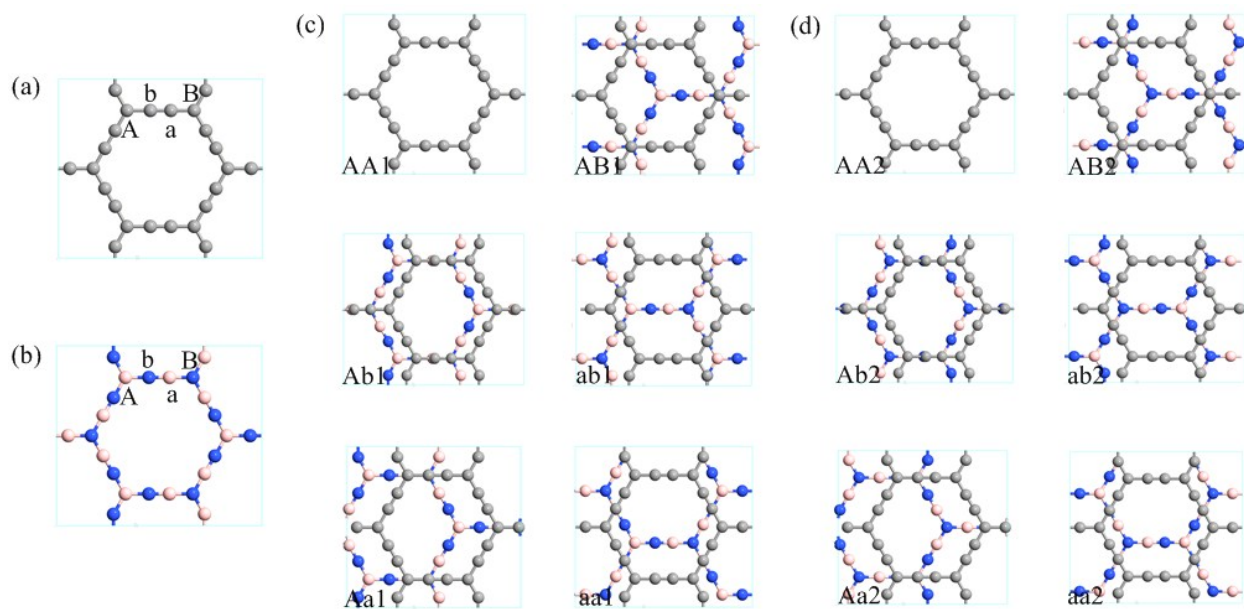

**Figure S1.** The crystal structure of (a)  $\alpha$ -GY and (b)  $\alpha$ -BNy. The names of the inequivalent C, B and N atoms are indicated. Different stacking modes of (c) C-B case and (d) C-N case for  $\alpha$ -GY/ $\alpha$ -BNy.

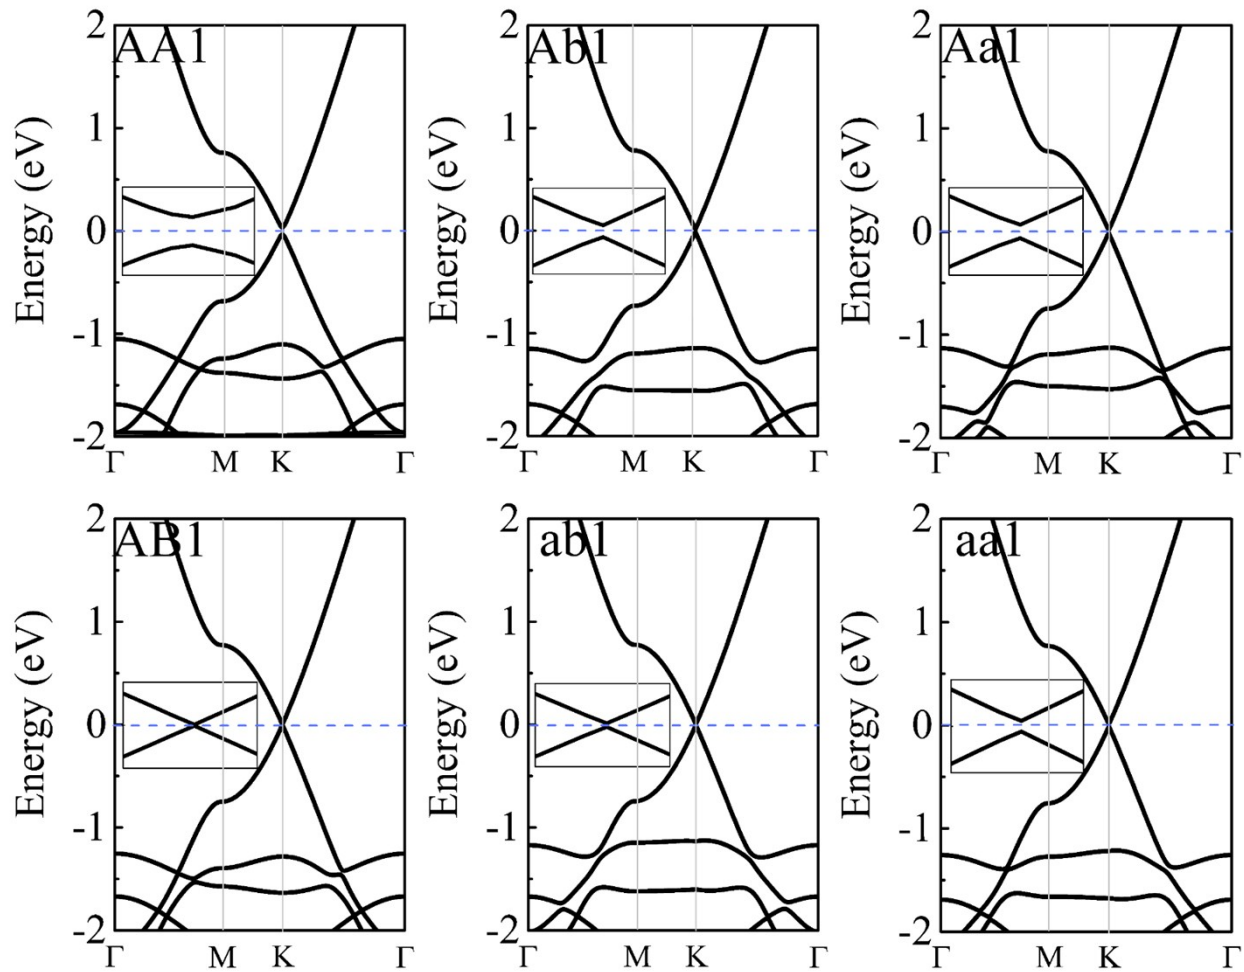

**Figure S2.** Band structures of different stacking modes for  $\alpha$ -GY/ $\alpha$ -BNy in C-B case.

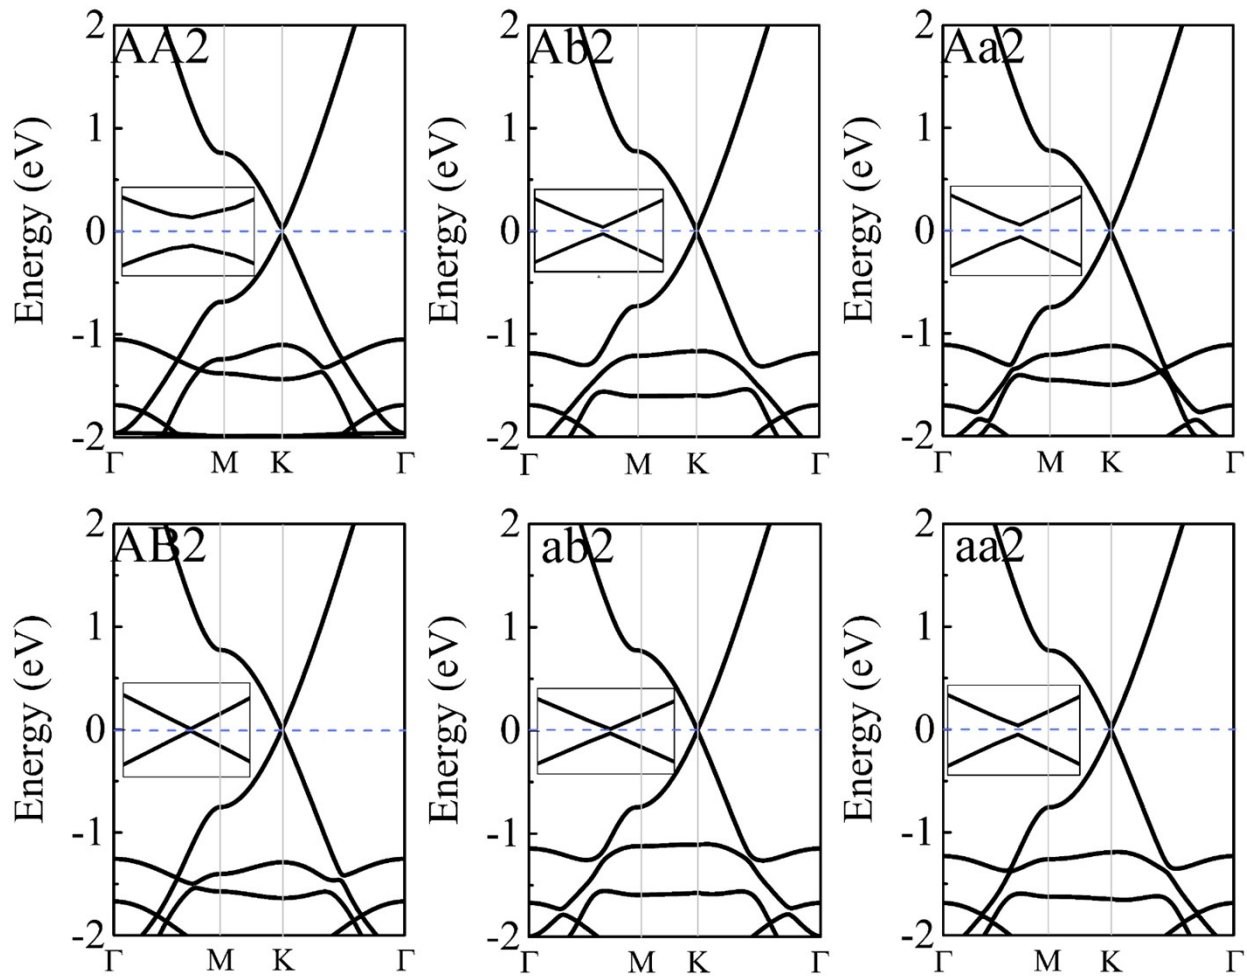

**Figure S3.** Band structures of different stacking modes for  $\alpha$ -GY/ $\alpha$ -BNy in C-N case.
